# Supplementary material
Source: PubMed Central journal article supplement (PMC4020063)
Supplement: 1319929111_sapp.pdf [file 1319929111_sapp.pdf]

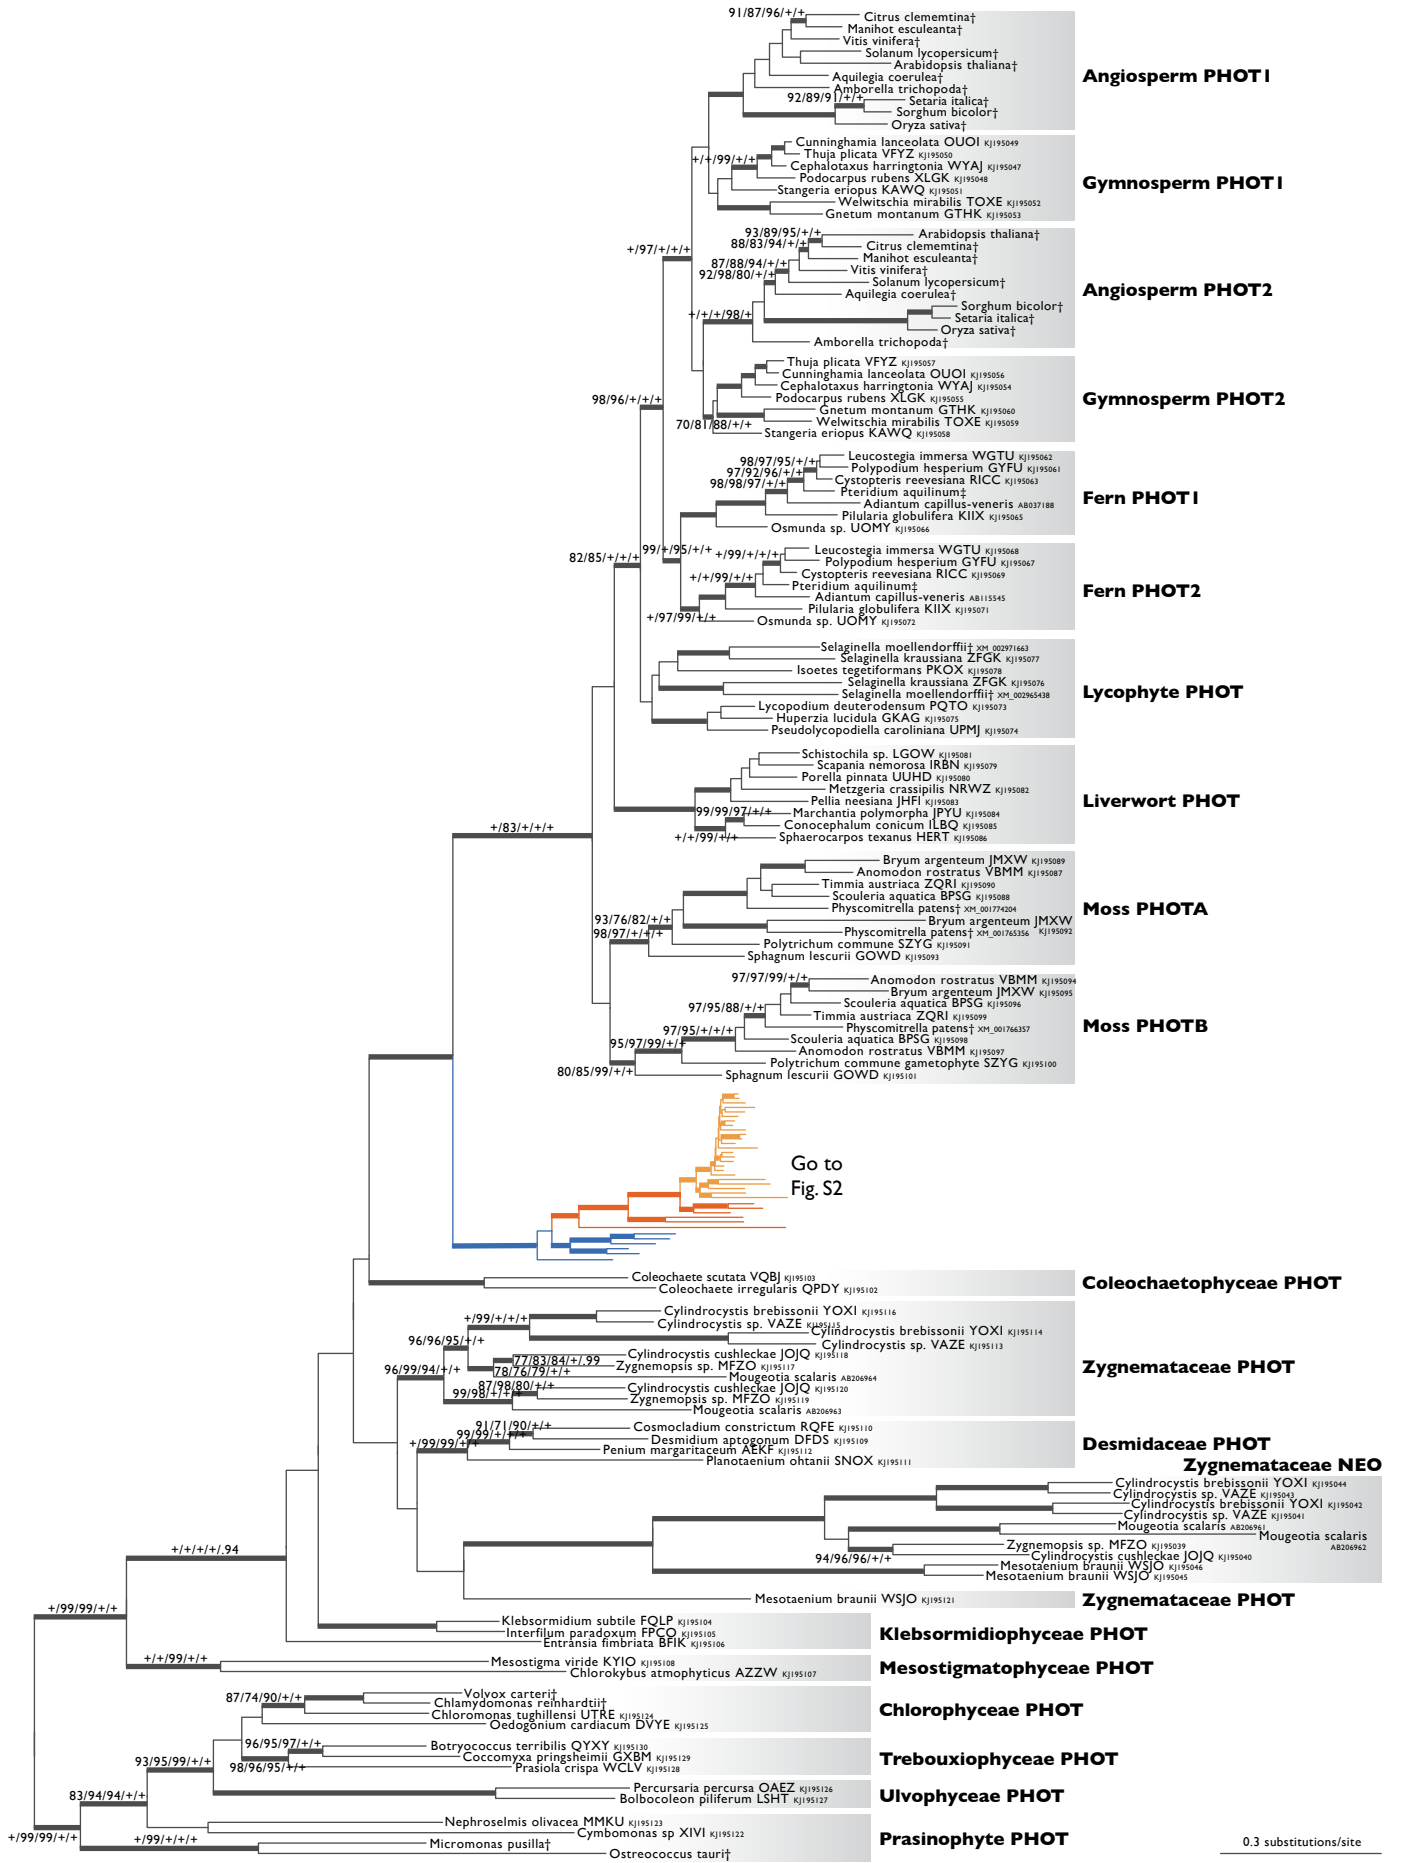

**Fig. S1.** Phylogenetic relationships of land plant and algal phototropin (PHOT) and the corresponding domains from hornwort, fern, and algal neochrome (NEO). Topology derived from the best maximum likelihood tree. The five support values associated with branches are maximum likelihood bootstrap values (BS) from Gari / BS from nhPhyML / aLRT supports under codon model (aLRT) / Bayesian posterior probabilities (PP) from MrBayes / PP from BEAST; these are only displayed (along with thickened branches) when BS > 70, aLRT > 70 and PP > 0.95. “+” denotes BS = 100, aLRT = 100 or PP = 1.00; thickened branches without numbers are “+/+/+/+”. Alphanumeric codes following species names are the four-letter 1KP transcriptome identifiers, or Genbank accessions, or both; “+” indicates the sequence came from genome sequence data, and “‡” from *Pteridium aquilinum* transcriptome. The blue, orange and yellow branches represent hornwort phototropin, hornwort neochrome and fern neochrome, respectively.

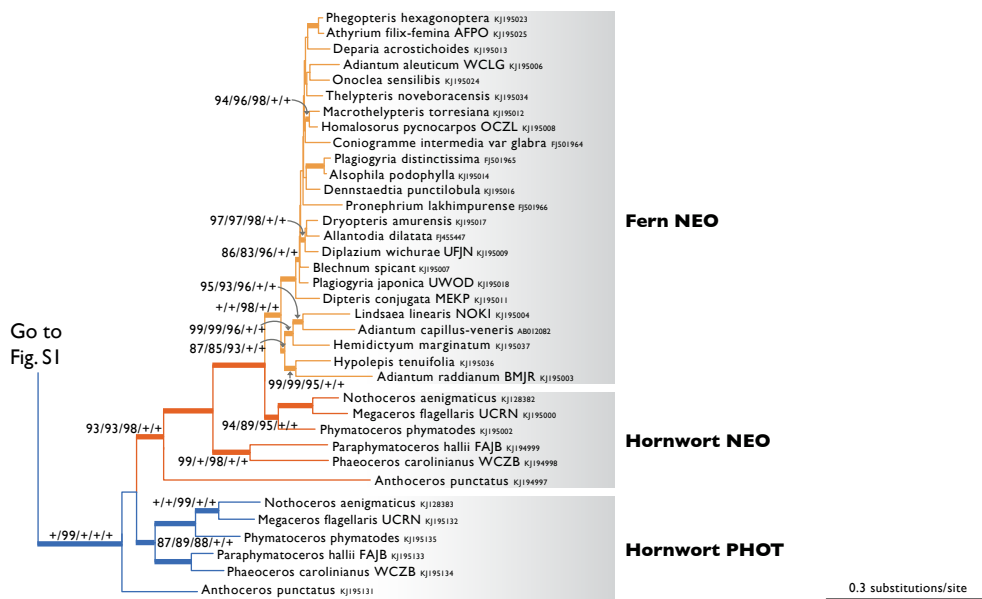

**Fig. S2.** Phylogenetic relationships of fern neochrome (NEO), hornwort neochrome and phototropin (PHOT). This figure is continued from Fig. S1 and follows the same conventions.

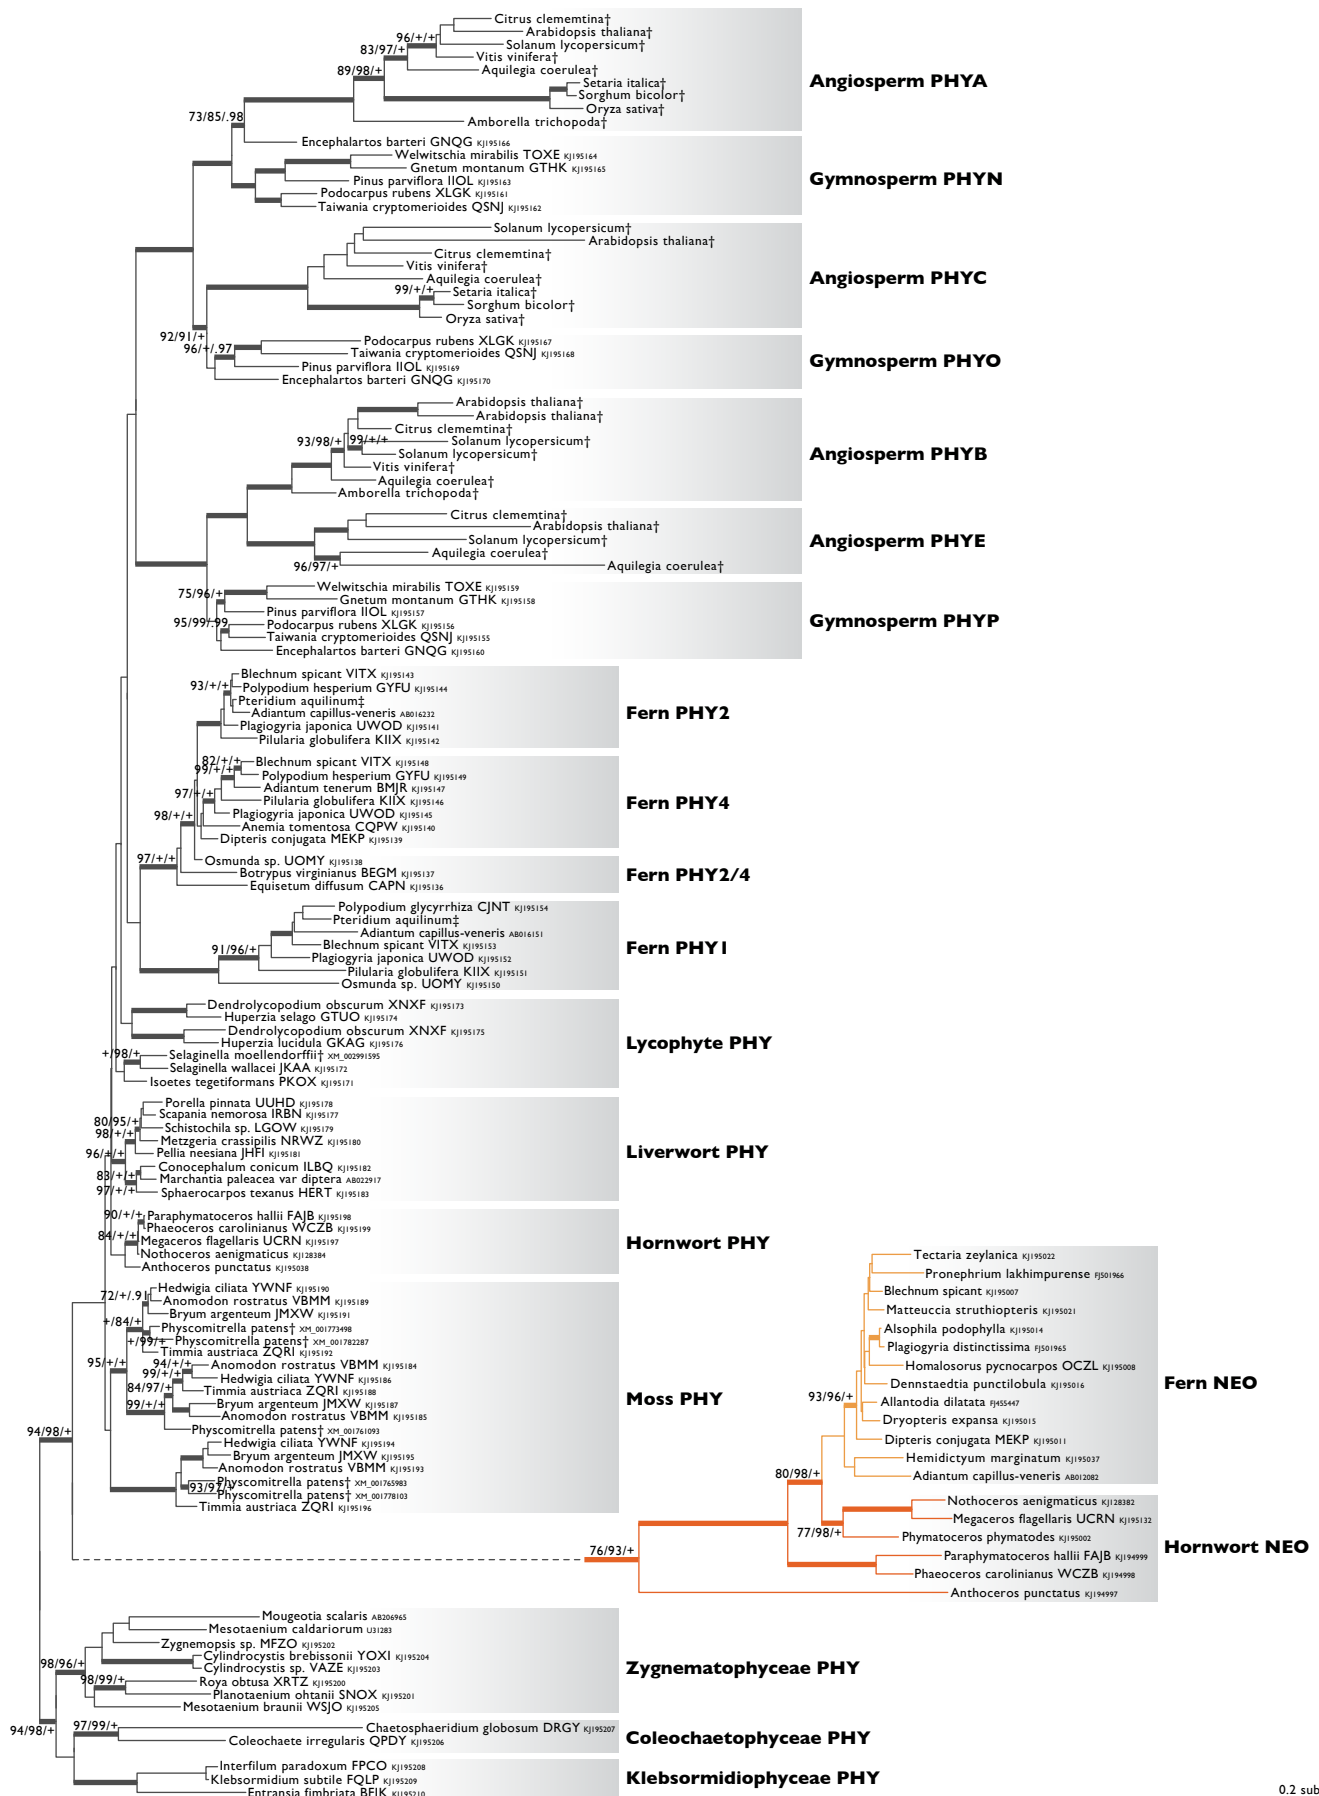

0.2 substitutions/site

**Fig. S3.** Phylogenetic relationships of land plant and algal phytochrome (PHY) and the corresponding domains from hornwort and fern neochrome (NEO). Topology derived from the best maximum likelihood tree. The three support values associated with branches are maximum likelihood bootstrap values (BS) / aLRT supports under codon model (aLRT) / Bayesian posterior probabilities (PP) from MrBayes; these are only displayed (along with thickened branches) if BS > 70, aLRT > 0.95 and PP > 0.95. “+” denotes BS = 100, aLRT = 100 or PP = 1.00; thickened branches without numbers are “+”/“+”/“+”. Alphanumeric codes following species names are the four-letter 1KP transcriptome identifiers, or Genbank accessions, or both; “†” indicates the sequence came from whole genome sequence data, and “‡” from *Pteridium aquilinum* transcriptome. For space considerations, the dashed line artificially extends the NEO clade and does not reflect true branch length. The orange and yellow branches represent hornwort neochrome and fern neochrome, respectively.

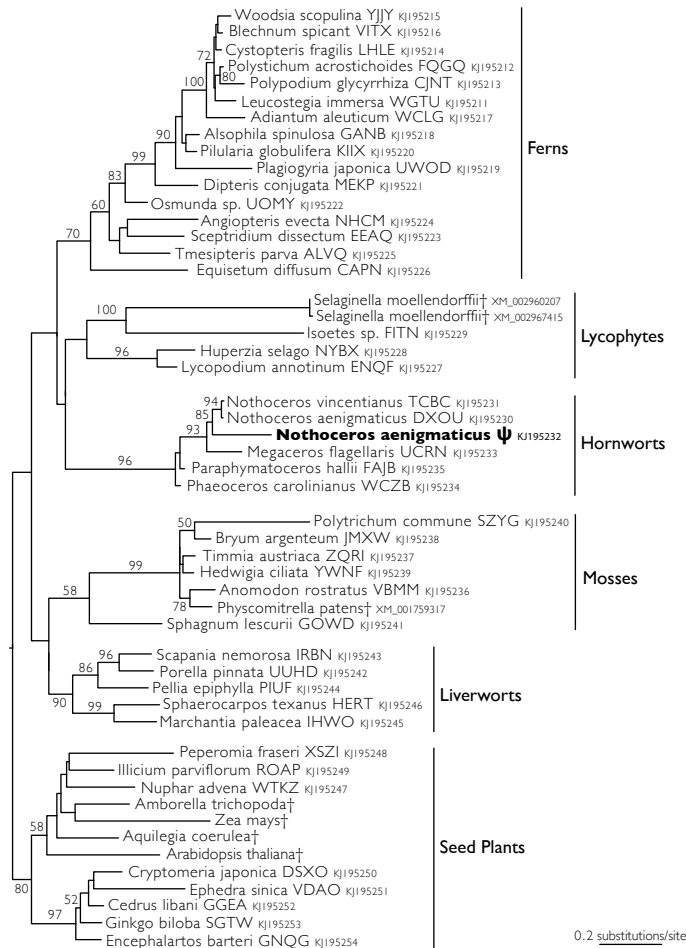

**Fig. S4.** Phylogenetic relationships of land plant imidazoleglycerol-phosphate dehydratase (IGPD). In the hornwort *Nothoceros aenigmaticus*, we conducted genome-walking downstream of neochrome and found a IGPD pseudogene (denoted by  $\psi$ ). In a land plant phylogeny of IGPD our *N. aenigmaticus* pseudogene is most closely related to other hornwort IGPD. This relationship confirms that our hornwort neochrome sequence data were indeed derived from the hornwort genome, and not from symbiotic algae or fungi. Numbers associated with branches are maximum likelihood bootstrap support values. Alphanumeric codes following species names are the four-letter 1KP transcriptome identifiers, or Genbank accessions, or both; “†” indicates the sequence came from whole genome sequence data.

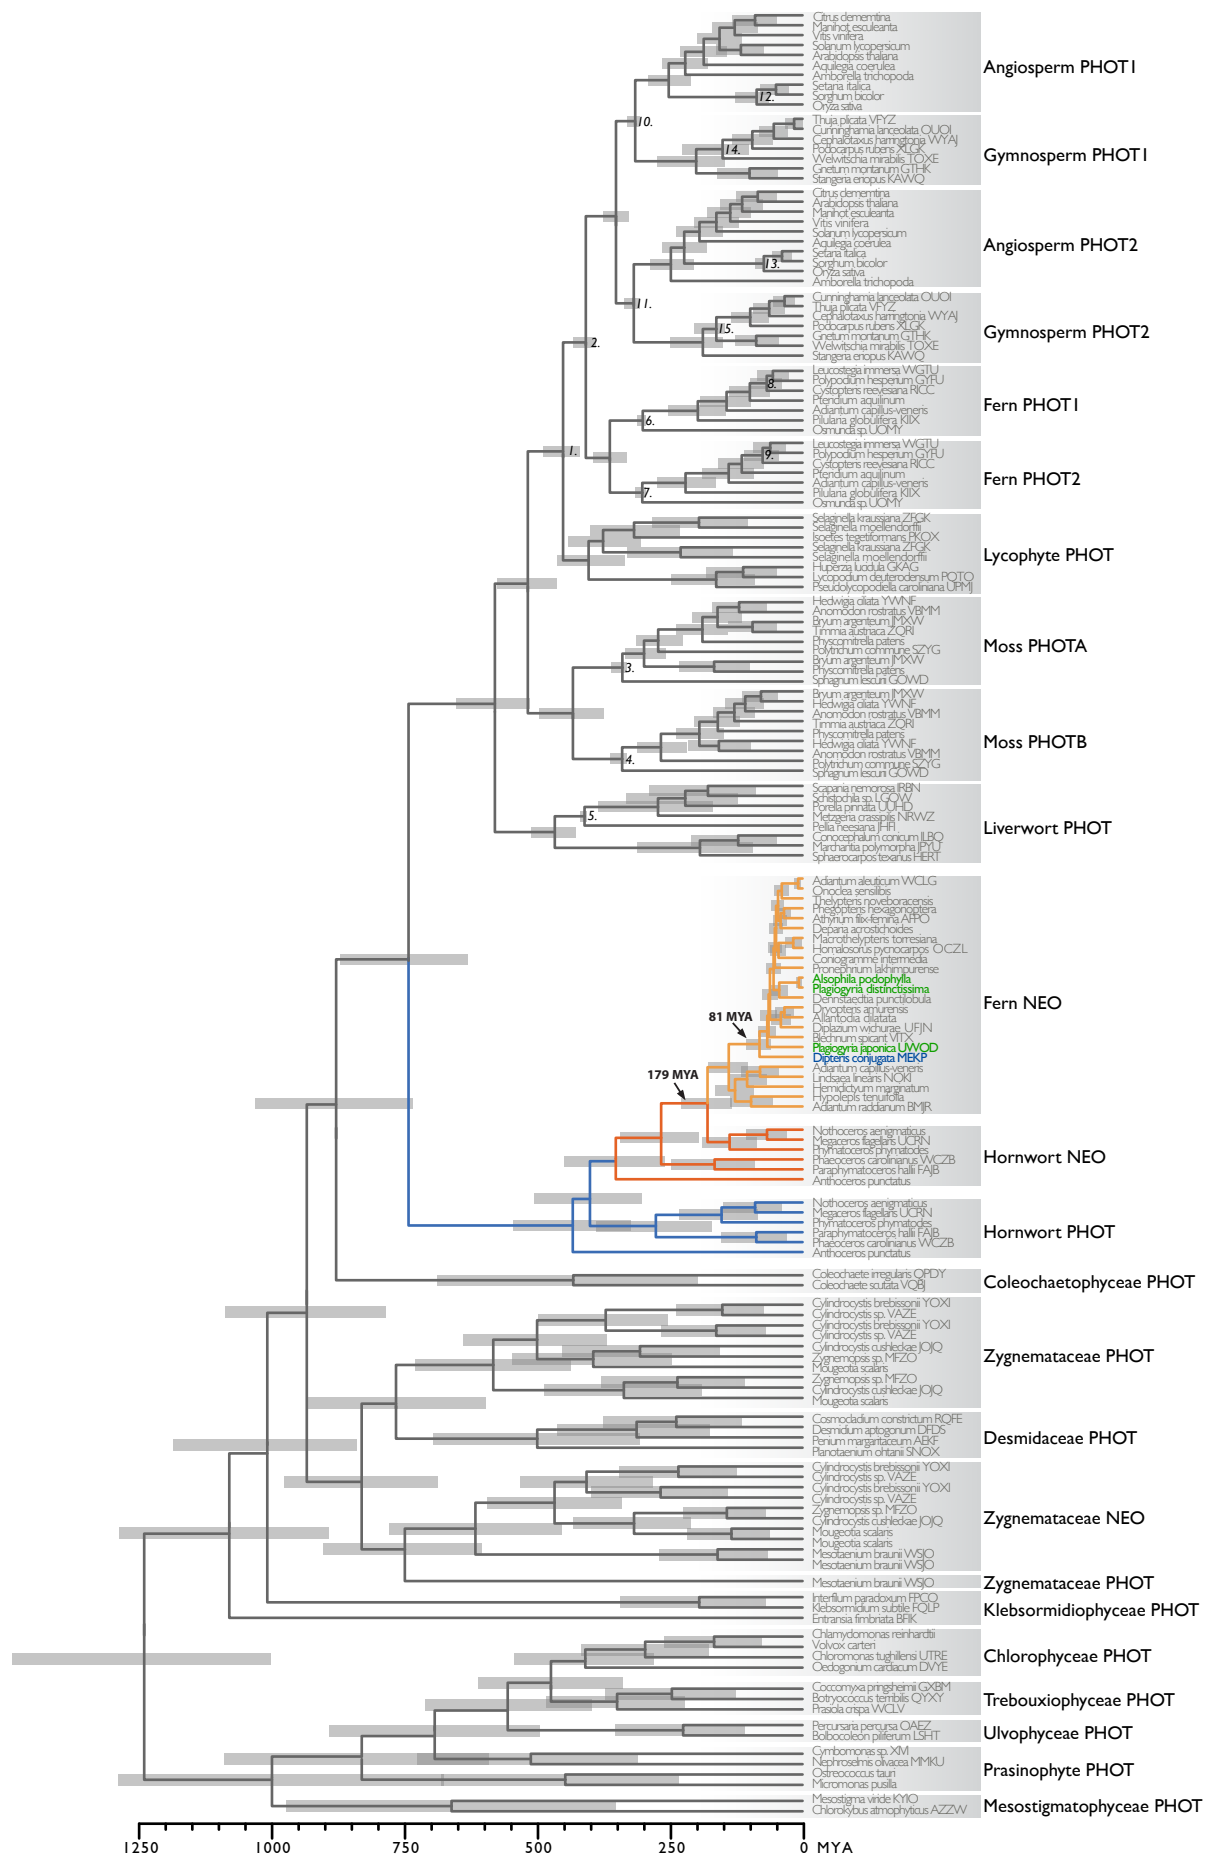

**Fig. S5.** Chronogram of land plant and algal phototropin (PHOT) and the corresponding domains from hornwort, fern, and algal neochrome (NEO). A simplified version of this figure is shown in Fig. 1B. Grey bars represent 95% highest posterior density intervals of the age estimates. Italicized numbers adjacent to nodes refer to the fossil or secondary time calibrations detailed in Table S2. Two divergence time estimates are highlighted: one marks the HGT event (179 MYA) and the other marks the split of Gleicheniales (blue taxon), Cyatheales (green taxa) and other neochromes (81 MYA).

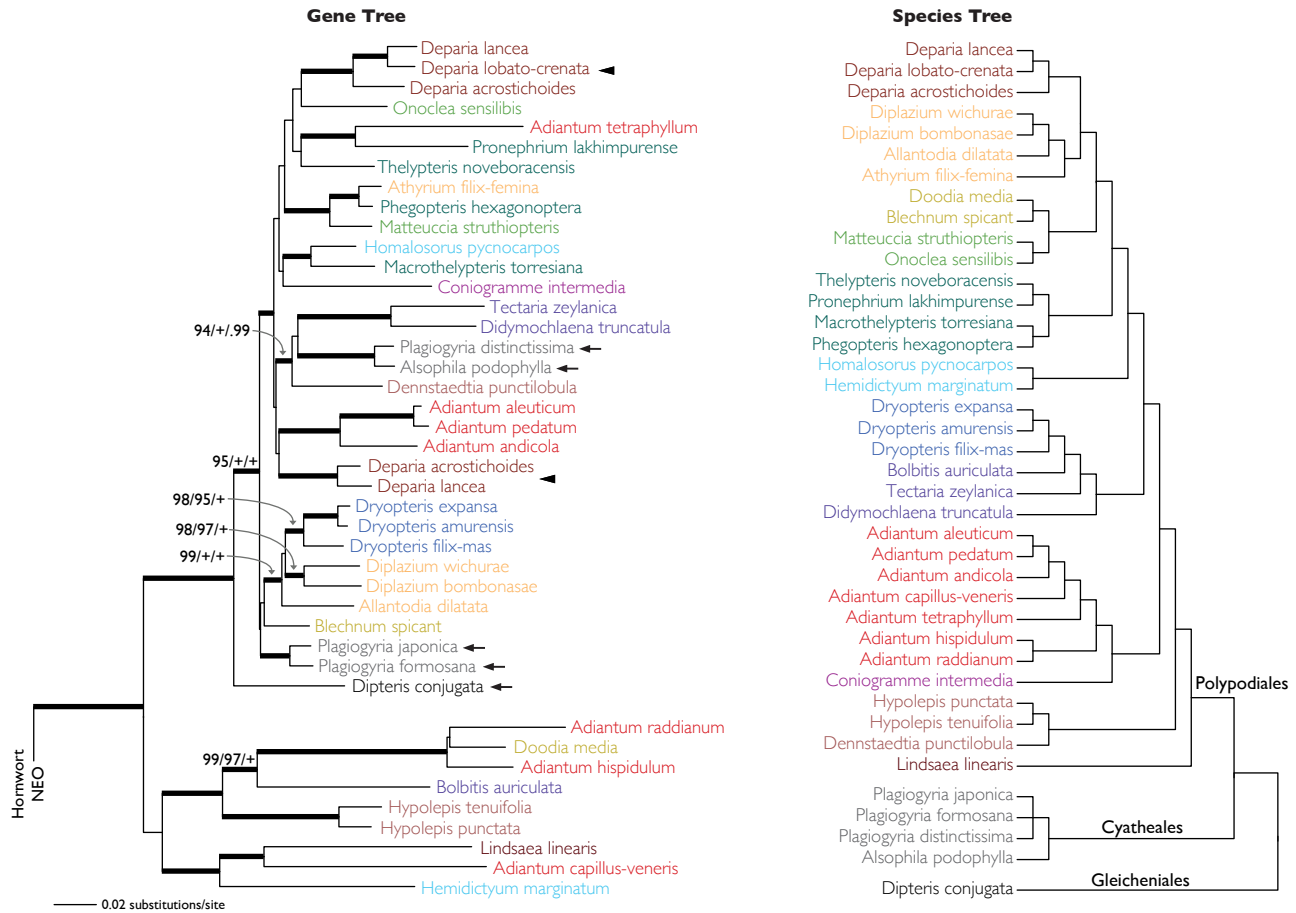

**Fig. S6.** Phylogenetic incongruence between fern neochrome gene tree and fern species tree. The gene tree topology is derived from the best maximum likelihood tree based on the nucleotide dataset, and the species tree summarized from Schuettpelz and Pryer (1), Kuo et al (2), Rothfels and Schuettpelz (3), and Rothfels et al (4). Tree inference based on codon models, 1st + 2nd and 3rd codon positions yielded similar topologies (Fig. S7). Closely related species/genera are coded with the same color. The neochrome gene tree is rooted with hornwort neochromes (not shown). Numbers above branches are maximum likelihood bootstrap values (BS) / aLRT supports under codon model (aLRT) / Bayesian posterior probabilities from MrBayes (PP), and are only displayed (along with thickened branches) if BS > 70, aLRT > 70 and PP > 0.95. "+" denotes BS = 100, aLRT = 100 or PP = 1.00; thickened branches without numbers are "+/+/"+. Arrowheads point to the two divergent neochrome copies found in *Deparia* spp. Arrows point to neochromes from Gleicheniales and Cyatheales that appear nested among Polypodiales neochromes.

- Schuettpelz E, Pryer KM (2007) Fern phylogeny inferred from 400 leptosporangiate species and three plastid genes. *Taxon* 56:1037–1050.
- Kuo LY, Li FW, Chiou WL, Wang CN (2011) First insights into fern matK phylogeny. *Mol Phylogenet Evol* 59:556–566.
- Rothfels CJ, Schuettpelz E (2013) Accelerated rate of molecular evolution for vittarioid ferns is strong but not driven by selection. *Syst Biol* 63:31–54.
- Rothfels CJ et al. (2013) Transcriptome-mining for single-copy nuclear markers in ferns. *PLoS ONE* 8:e76957.

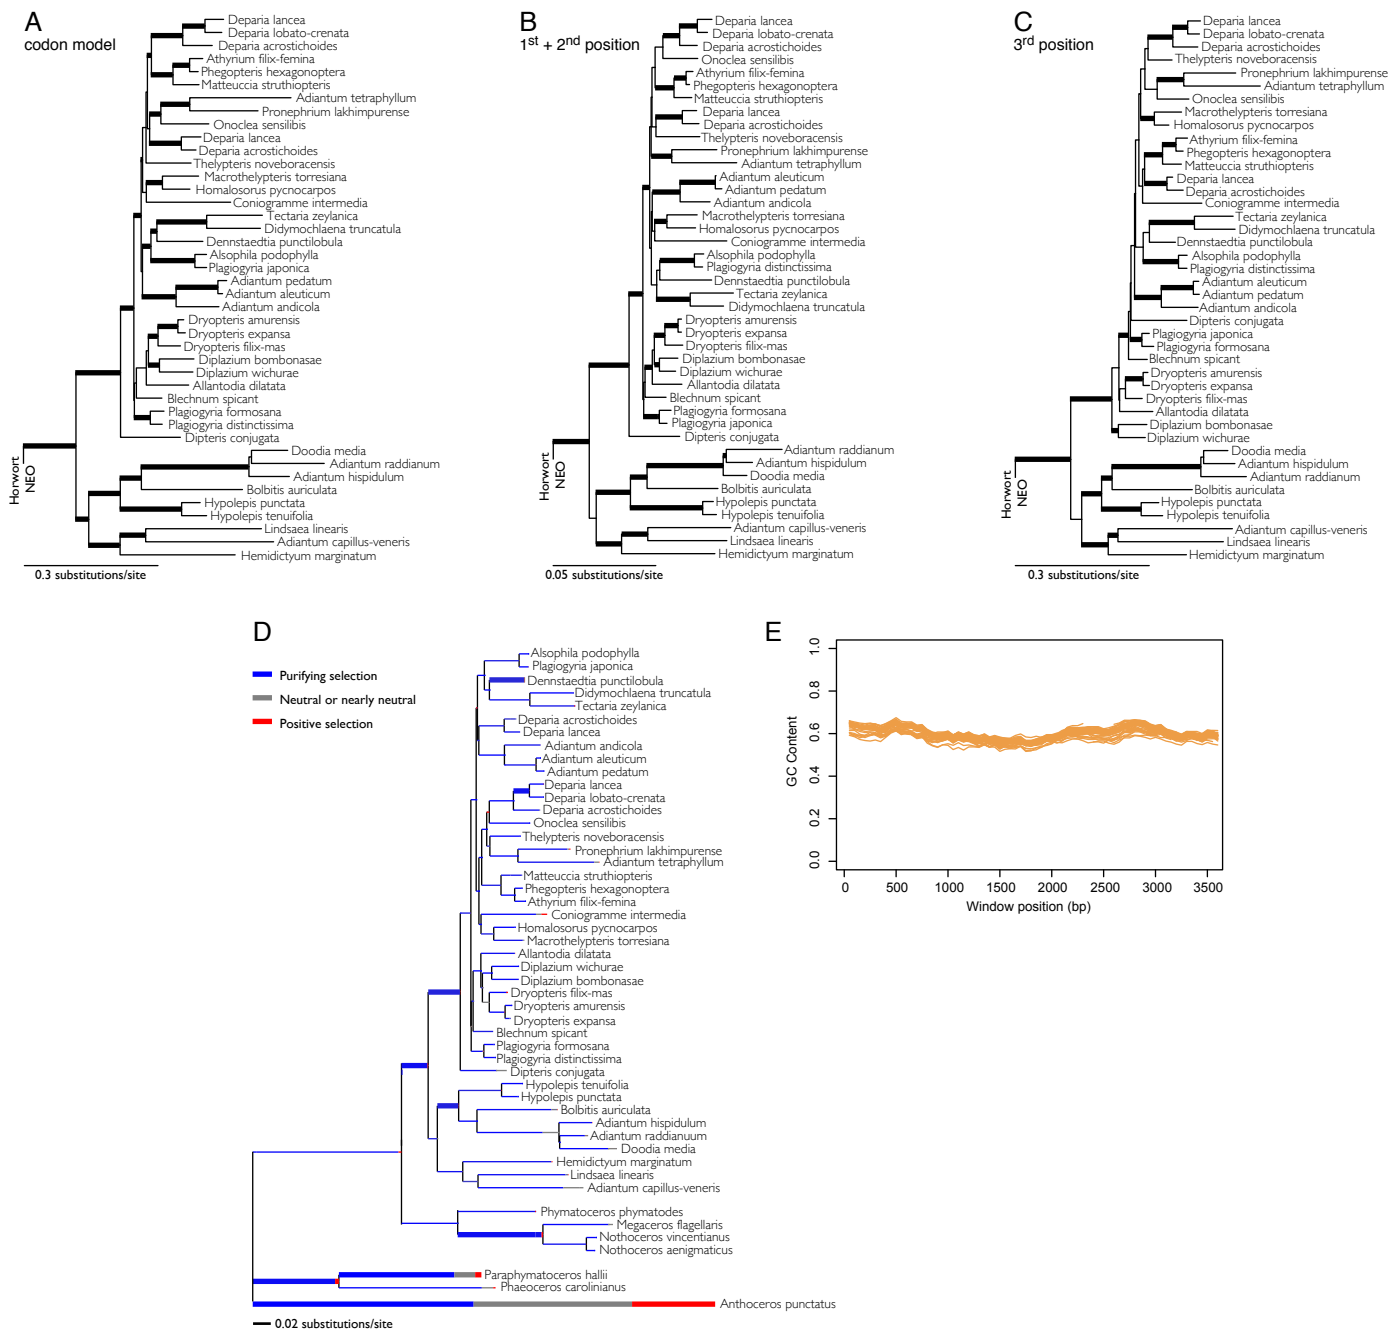

**Fig. S7.** Phylogeny, selection profile and GC content of fern neochromes. Maximum likelihood reconstructions of gene phylogeny based on (A) codon model, (B) first and second codon positions, and (C) third codon position. Thickened branches indicate aLRT supports (in A) or bootstrap supports (in B, C) > 70. (D) Selection profile displayed along phylogenetic branches for fern and hornwort neochromes. Tree topology derived from the best maximum likelihood tree (Fig. S6). The width of each color along a branch is proportional to the number of codon sites in the corresponding selection class. Thickened branches have experienced significant episodic positive selection ( $P < 0.05$ ). (E) Sliding window analysis of GC content for fern neochrome. Each line displays the GC content for each neochrome sequence. None of the ferns in our study were deviant in base composition for neochrome. Each window is 400bp in size and the window slides every 50bp.

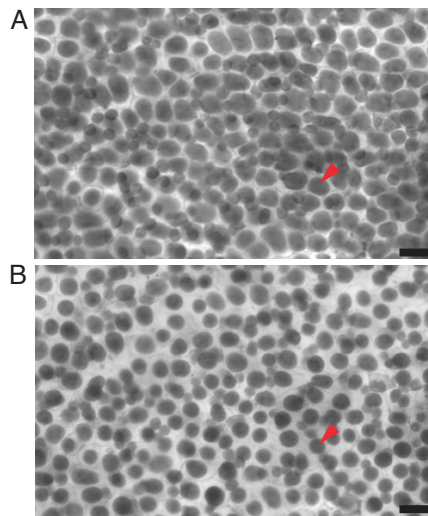

**Fig. S8.** Hornwort chloroplasts (arrowhead) contract under strong light. (A) Before irradiation, chloroplasts of *Nothoceros aenigmaticus* occupy most of the cellular space. (B) After irradiation of blue light ( $57 \mu\text{mol m}^{-2} \text{s}^{-1}$ ) for 2 hours, chloroplasts evidently reduced in size. Scale bar = 40  $\mu\text{m}$ .



**Table S1.** List of transcriptomes and genome sequences screened for neochrome, phototropin and phytochrome genes. All the transcriptomes were from 1KP (www.onekp.com), except for *Pteridium aquilinum*. The four letter codes following species names are the 1KP transcriptome identifiers. Details of transcriptome tissue type and specimen voucher can be found at www.onekp.com. "\*" denotes whole or draft genome sequences.

| Angiosperms                       | Ferns                            | Lycophytes                          | Charophytes                        | Chlorophyceae                       | Prasinophytes                        |
|-----------------------------------|----------------------------------|-------------------------------------|------------------------------------|-------------------------------------|--------------------------------------|
| Amborella trichopoda*             | Adiantum aleuticum WCLG          | Dendrolycopodium obscurum XNXF      | Bambusina borrieri QWV             | Ankistrodesmus sp. OTQG             | Bathycoccus prasinos MCPK            |
| Aquilegia coerulea*               | Adiantum raddianum BMJR          | Diphasiastrum digitatum WAFT        | Chaetosphaeridium globosum DRGY    | Aphanochaete repens JIMT            | Dybbomonas sp. XVI                   |
| Arabidopsis lyrata*               | Anemia tomentosa CQPW            | Huperzia lucidula GKAG              | Chara vulgaris MWXT                | Asteromonas gracilis NTLT           | Colymbomastix tenuilepis XOAL        |
| Arabidopsis thaliana*             | Angiopteris evecta NHCM          | Huperzia myrsinites CBAE            | Chlorokybus atomofusus AZZW        | Brachiomonas submarina GUBD         | Mantonella squamata QXSZ             |
| Brachypodium distachyon*          | Argyrochosma nivea XDDT          | Huperzia selago GTUO                | Closterium lunula DRFX             | Carteria crucifera VIAU             | Micromonas pusilla*                  |
| Capsella rubella*                 | Asplenium nidus PSKY             | Huperzia selago NYBX                | Coleochaete irregularis QPDY       | Carteria obtusa RUIF                | Monomastix opisthostigma BTFM        |
| Carica papaya*                    | Asplenium platyneuron KJZG       | Huperzia squarrosa GAON             | Coleochaete scutata VQBJ           | Chaetopeltis orbicularis BAZF       | Nephroselmis olivacea MMKU           |
| Citrus clementina*                | Azolla caroliniana CVEG          | Lycopodiella appressa ULKT          | Cosmarium broomei HIDG             | Chlamydomonas reinhardtii*          | Nephroselmis pyriformis ISIM         |
| Citrus sinensis*                  | Athyrium filix-femina URCP       | Lycopodium annotinum ENQF           | Cosmarium granatum MNMNM           | Chlamydomonas bilatus MULF          | Ostreococcus tauri*                  |
| Cucumis sativus*                  | Athyrium filix-femina AFPO       | Lycopodium deuterodensum PQTO       | Cosmarium ochthodes JJVM           | Chlamydomonas cribrum BCYF          | Ostreococcus lucimarinus*            |
| Eucalyptus vulgaris*              | Blechnum spicatum VITX           | Phylloglossum drummondii ZZEI       | Cosmarium ochthodes STJK           | Chlamydomonas moewusii JRGZ         | Picocystis salinarum TGNL            |
| Fragaria vesca*                   | Bolbitis repanda JBLI            | Pseudolycopodiella caroliniana UPMJ | Cosmarium subtumidum WDWG          | Chlamydomonas noctigama VALZ        | Prasinococcus capsulatus XMCL        |
| Glycine max*                      | Botrypus virginianus BEGM        | Selaginella moellendorffii*         | Cosmarium tinctum BHBK             | Chlamydomonas sp. TSBQ              | Prasinoderma coloniale HYHN          |
| Gossypium raimondii*              | Cibotium glaucum ORJE            | Selaginella acanthonota ZYCD        | Cosmoladium cf. constrictum RQFE   | Chlamydomonas sp. AOJU              | Pseudocosticoidia marina JMTE        |
| Linum usitatissimum*              | Crepidomanes venosum TWZF        | Selaginella apoda LGDQ              | Cylindrocystis brebissonii VXDJ    | Chloromonas oogama IHOI             | Pycnococcus provasolii MXXE          |
| Malus domestica*                  | Cryptogramma acrostichoides WQML | Selaginella kraussiana ZFGK         | Cylindrocystis brebissonii RFGJ    | Chloromonas perforata QRTH          | Pyramimonas parkeae TNAW             |
| Manihot esculenta*                | Culcita macrocarpa PNZO          | Selaginella lepidophylla ABJI       | Cylindrocystis cushleakeae JOJQ    | Chloromonas reticulata LBRP         | Scherffelia dubia FMVB               |
| Medicago truncatula*              | Selaginella selaginoides KUXM    | Selaginella selaginoides KUXM       | Cylindrocystis sp. VAZE            | Chloromonas rosae AJUW              | Tetraselmis chuii HVNO               |
| Mimulus guttatus*                 | Cystopteris fragilis XXHP        | Selaginella stauntoniana ZZOL       | Desmidium aptogonium DFDS          | Chloromonas subdvisia GFUR          | Tetraselmis cordiformis DUMA         |
| Oryza sativa*                     | Oryza sativa*                    | Selaginella willdenowii KJYC        | Entransia fibrariata BFIK          | Chloromonas tughiensis UTRF         | Tetraselmis striata HHXJ             |
| Panicum virgatum*                 | Cystopteris protusa YOWV         | Selaginella willdenowii KJYC        | Euastrum affine GYRP               | Chlorosarcinopsis halophila KSFK    | cocoid prasinophyte XUGM             |
| Phaseolus vulgaris*               | Cystopteris reevesiana RICC      | Selaginella willdenowii KJYC        | Gonatozogon kinahanii KEYW         | Dunaliella salina RHVC              | <b>Glaucophyta</b>                   |
| Populus trichocarpa*              | Cystopteris utahensis HNDZ       | Selaginella willdenowii KJYC        | Interfilum paradoxum FPCC          | Dunaliella tertiolecta ZDIZ         | Cyanophora paradoxa QFND             |
| Prunus persica*                   | Davallia fejeensis OQWW          | Selaginella willdenowii KJYC        | Klebsormidium subtile FQLP         | Eudorina elegans RNAT               | Cyanophora paradoxa YTYU             |
| Ricinus communis*                 | Denstaedia davallioides MTGC     | Selaginella willdenowii KJYC        | Mesostigma viride KYIO             | Fritschella tuberosa VFIV           | Cyanopteryx gloeocystis JKHA         |
| Setaria italica*                  | Deparia lobato-crenata FCHS      | Selaginella willdenowii KJYC        | Mesostigma braunii WSJO            | Golenkia longispicula BZSH          | Glaucocystis cf. nostochinearum POOW |
| Solanum lycopersicum*             | Didymochlaena truncatula RFRB    | Selaginella willdenowii KJYC        | Mesotaenium caldariorum HKZW       | Gonium pectorale KUJJI              | Gloeochaete wittrockiana PQED        |
| Solanum tuberosum*                | Diplazium wichurae UFJN          | Selaginella willdenowii KJYC        | Mesotaenium endoterianum WDCW      | Haematococcus pluvialis ODXI        | <b>Red Algae</b>                     |
| Sorghum bicolor*                  | Dipteris conjugata MEKP          | Selaginella willdenowii KJYC        | Mesotaenium kramstei NBPY          | Haematococcus pluvialis AGIO        | Betaphycus gelatinae BWVJ            |
| Theobroma cacao*                  | Equisetum diffusum CAPN          | Selaginella willdenowii KJYC        | Micrasteria fibrariata MCHJ        | Haefniomonas reticulata FXHG        | Ceramium kondoi VZWM                 |
| Vitis vinifera*                   | Equisetum hyemale JVSZ           | Selaginella willdenowii KJYC        | Mougeotia sp. ZRMT                 | Helicodictyon planctonicum AJAU     | Chondrus crispus GQXP                |
| Zea mays*                         | Gaga arizonica DCDT              | Selaginella willdenowii KJYC        | Netrium digitus FFRG               | Heterochlamydomonas inaequalis IRYH | Chroocytium ornatum LLXJ             |
| <b>Gymnosperms</b>                | Gymnocarpium dryopteris HEGQ     | <b>Hornworts</b>                    | Nucleotenus eifelense KMNX         | Lobochlamys segnis OFUE             | Dumontia simplex IEHF                |
| Austrotaxus spicata BTTS          | Hemionitis arifolia XZJO         | Anthoceros punctatus* <sup>2</sup>  | Onychonema laeve GGWH              | Lobomonas rostrata JKKI             | Euchemua denticulatum JEBK           |
| Callitris macleayana RMMV         | Homalorusus pycnocarpus OCZL     | Megaceros flagellaris UCRN          | Penium exiguum YSQT                | Microspora cf. tumidula FOYQ        | Glaucosphaera vacuolata R5OF         |
| Cathaya agropyrophylla NPRL       | Hymenophyllum bivalve QIAD       | Nothoceros vinctianus TCBC          | Penium margaritaceum AEKF          | Neochloris oleobandans EEJO         | Gloeopeltis furcata SBLT             |
| Cedrus libani GGEA                | Hymenophyllum cupressiforme TRPJ | Nothoceros aenigmaticus DXOU        | Phymatodocis nordstetiana RPQV     | Neochloris sp. GIJY                 | Mazzella asiatica VNAL               |
| Cephalotaxus harringtonia WYAJ    | Leucostegia immersa WGTU         | Nothoceros aenigmaticus DXOU        | Planotaenium ohtanii SNOX          | Neochlorosarcina sp. USIX           | Gracilaria chodgettii LPJN           |
| Cryptomeria japonica DSXO         | Lindsaea linearis NOKI           | Paraphymoceros hallii FAJB          | Pleurotaenium trabecula MOYV       | Oedogonium cardiacum DVYE           | Gracilaria bougetii FTRP             |
| Cunninghamia lanceolata OLOI      | Lindsaea microphylla YXPJ        | Phaeoceros carolinianum WCZB        | Roya obtusa XRTZ                   | Oedogonium foveolatum SDPC          | Gracilaria lemaneiformis IKWM        |
| Cupressus dupreziana QNGJ         | Lygodium japonicum PBUA          | Gaga arizonica DCDT                 | Spirogyra sp. HAOC                 | Oogamochlamys gigantea XDLL         | Gracilaria filicina ZJOJ             |
| Cycas micholitzii XZUY            | Marattia sp. UXCS                | Gymnocarpium dryopteris HEGQ        | Spirotaenia minuta NNHQ            | Pandorina morum RYXJ                | Grateloupia livida IKIZ              |
| Dioon edule WLIC                  | Myriopteris eatonii GSXD         | Hemionitis arifolia XZJO            | Spirotaenia sp. TNHT               | Pediastrum duplex XKWQ              | Grateloupia turuturu UR5B            |
| Encephalartos barteri GNQG        | Nephrolepis exaltata NWWI        | Blasia sp. AEXY                     | Staurasteria sebaldis ISHC         | Pediastrum duplex XTON              | Grateloupia turuturu UR5B            |
| Ephedra sinica VDAO               | Notholaena montiae YCKE          | Blasia sp. AEXY                     | Staurodesmus convergens WCQU       | Phacotus lenticularis ZIVZ          | Gymnogongrus tubelliformis CKXF      |
| Ginkgo biloba SGTW                | Oncoclea sensibilis HTHF         | Blasia sp. AEXY                     | Staurodesmus omearii RPRU          | Phacotus lenticularis ZIVZ          | Heterosiphonia flagellata Y5BD       |
| Glyptostrobus pensilis OXGJ       | Ophioglossum petiolatum QHVS     | Blasia sp. AEXY                     | Xanthidium antilopaenum GBGT       | Pleurastrum insigne PRIQ            | Kappaphycus alvarezii IHJY           |
| Gnetum montanum GTHK              | Ophioglossum petiolatum WTJG     | Blasia sp. AEXY                     | Zygnemopsis sp. MFZO               | Pteromonas angulosa LNLI            | Mazzella japonica WEIN               |
| Juniperus scopulorum XMGP         | Osmunda javanica VIBO            | Blasia sp. AEXY                     | <b>Trebouxioxyphyceae</b>          | Pteromonas sp. ACRY                 | Polysiphonia japonica XAXW           |
| Keteleeria evelyniana JUWL        | Osmunda regalis YKSS             | Blasia sp. AEXY                     | Botryococcus braunii ETGN          | Senedesmus dimorphus PZIF           | Porphyra yezensis ZULJ               |
| Larix speciosa WVVN               | Osmunda regalis UOMY             | Blasia sp. AEXY                     | Botryococcus sudeticus VJZD        | Sourfieldia sp. EGNB                | Porphyridium cruentum OBUY           |
| Nothotsuga longibracteata AREG    | Osmundastrum cinnamomeum BIVQ    | Blasia sp. AEXY                     | Botryococcus terribilis QYXY       | Spermatozopsis exultans MXDS        | Porphyridium purpureum PVGP          |
| Phyllocladus hypophyllum JRNA     | Pilularia globulifera KIIX       | Blasia sp. AEXY                     | Chlorella minutissima MWAN         | Spermatozopsis similis ENAU         | Rhodella violacea RTLC               |
| Picea engelmannii AWQB            | Pityrogramma trifoliolata UJTT   | Blasia sp. AEXY                     | Coccomyxa pringsheimii GXBM        | Staphanosphaera pluvialis ZLQE      | Rhodella violacea RTLC               |
| Pinus jeffreyi MFTM               | Plagiogyria japonica UWOD        | Blasia sp. AEXY                     | Eremosphaera viridis MNCB          | Stigeodinium helveticum JMUI        | Rhodella violacea RTLC               |
| Pinus parviflora ILOL             | Pleopeltis polydoides UJWU       | Blasia sp. AEXY                     | Geminella sp. PFUD                 | Uronema sp. ISGT                    | Sinotubimorpha guangdongensis PYDB   |
| Pinus ponderosa JBND              | Polypodium amorphum YLJA         | Blasia sp. AEXY                     | Leptosira obovata ZNUM             | Uronema belkae RAWF                 | <b>Chromista</b>                     |
| Pinus radiata DZQM                | Polypodium glycyrrhiza CJNT      | Blasia sp. AEXY                     | Microthammonium kuetzingianum DXNY | Vitreochlamys sp. QWRA              | Chroomonas sp. ROZZ                  |
| Podocarpus coriaceus SCEB         | Polypodium hesperium GFYU        | Blasia sp. AEXY                     | Nannochloris atomus MYFC           | Vulvox carteri*                     | Colpomenia sinuosa QLMZ              |
| Podocarpus rubens XLGK            | Polypodium hesperium IXLH        | Blasia sp. AEXY                     | Parachlorella kessleri AKCR        | Vulvox aureus JWGT                  | Cryptomonas cruenta BAKF             |
| Pseudolarix amabilis AQFM         | Phlebodium pseudoaureum ZQYU     | Blasia sp. AEXY                     | Pedinomonas minor RRSV             | Vulvox aureus WRSL                  | Desmarestia viridis LSQE             |
| Pseudotsuga cheniensis YLPM       | Psilostichum acrostichoides FQGG | Blasia sp. AEXY                     | Pedinomonas tuberculata PUAN       | Vulvox globator ISPU                | Dipteris undulata FRFF               |
| Pseudotsuga menziesii IOVS        | Psilotum nudum QVMR              | Blasia sp. AEXY                     | Prasiola crispa WCLV               | <b>Ulvoxyceae</b>                   | Hemiselmis virescens MJMQ            |
| Sciadopytes verticillata YFZK     | Pteridium aquilinum <sup>1</sup> | Blasia sp. AEXY                     | Prototheca wickerhamii BILC        | Acrosiphonia sp. JIJW               | Ishige okamurai APTP                 |
| Stangeria eriopus KAWQ            | Pteris ensiformis FLTD           | Blasia sp. AEXY                     | Stichococcus bacillaris WXRI       | Blastophysa cf. rhizopus VHJ        | Ischyrschys sp. BAJW                 |
| Taiwania cryptomerioides QNSJ     | Pteris vittata POPI              | Blasia sp. AEXY                     | Trebouxia arboricola NKXU          | Bolbocoleon piliferum LSHT          | Kjellmaniella crassifolia RAPP       |
| Taxus baccata WWSS                | Sceptridium dissectum EEAQ       | Blasia sp. AEXY                     |                                    | Bryopsis plumosa JTIG               | Laminaria japonica OGZM              |
| Taxus cuspidata ZYAX              | Sticherus lobatus XDVW           | Blasia sp. AEXY                     |                                    | Cephaleuros virescens YDCQ          | Laminaria japonica QDVT              |
| Thuja plicata VFYZ                | Thelypteris acuminata MROH       | Blasia sp. AEXY                     |                                    | Cladophora glomerata VBLH           | Mallomonas sp. BOGT                  |
| Thujaops dolabrata NKIN           | Thyrsopteris elegans EWXK        | Blasia sp. AEXY                     |                                    | Codium fragile GYBH                 | Nannochloropsis oculata JQFK         |
| Torreya nucifera HQOM             | Tmesipteris parva ALVQ           | Blasia sp. AEXY                     |                                    | Cylindrocapsa geminella DZPJ        | Ochroomonas sp. EBWI                 |
| Torreya taxifolia EFMV            | Vittaria appalachiana NDUV       | Blasia sp. AEXY                     |                                    | Entocladia endozoa OQON             | Pavlova lutheri LLEN                 |
| Tsuga heterophylla GAMH           | Vittaria lineata SKYV            | Blasia sp. AEXY                     |                                    | Halochlorococcum marinum ALZF       | Pavlova lutheri NMAK                 |
| Welwitschia mirabilis TOXE        | Woodsia ilvensis YQEC            | Blasia sp. AEXY                     |                                    | Ignatius tetrasporus KADG           | Pavlova lutheri RFAD                 |
| Widdringtonia cedarbergensis AUDE | Woodsia scopulina YJJY           | Blasia sp. AEXY                     |                                    | Ochlochaete sp. CQQP                | Petalonia fascia VRGZ                |
| Wollemia nobilis RSCE             |                                  | Blasia sp. AEXY                     |                                    | Oltmannsiellopsis viridis PZBH      | Prorocentrum micans TZJQ             |
|                                   |                                  | Blasia sp. AEXY                     |                                    | Oltmannsiellopsis viridis QJYX      | Proteomonas sulcata IRZA             |
|                                   |                                  | Blasia sp. AEXY                     |                                    | Punctaria latifolia ASZK            | Prymnesium parvum LXRN               |
|                                   |                                  | Blasia sp. AEXY                     |                                    | Punctaria latifolia ASZK            | Punctaria latifolia ASZK             |
|                                   |                                  | Blasia sp. AEXY                     |                                    | Planophila laetevirens CBNG         | Rhodomonas sp. IAYV                  |
|                                   |                                  | Blasia sp. AEXY                     |                                    | Planophila terrestris LETF          | Sargassum horneri RWXW               |
|                                   |                                  | Blasia sp. AEXY                     |                                    | Trentepohlia annulata NATT          | Sargassum thurbergi YRMA             |
|                                   |                                  | Blasia sp. AEXY                     |                                    |                                     | Sargassum vachellianum HFJK          |
|                                   |                                  | Blasia sp. AEXY                     |                                    |                                     | Sargassum fusiforme LDYR             |
|                                   |                                  | Blasia sp. AEXY                     |                                    |                                     | Sargassum hemiphysillum YVER         |
|                                   |                                  | Blasia sp. AEXY                     |                                    |                                     | Sargassum henslowianum FIKG          |
|                                   |                                  | Blasia sp. AEXY                     |                                    |                                     | Sargassum integerrimum FOMH          |
|                                   |                                  | Blasia sp. AEXY                     |                                    |                                     | Sargassum muticum JGGD               |
|                                   |                                  | Blasia sp. AEXY                     |                                    |                                     | Scytosiphon lomentaria JXCF          |
|                                   |                                  | Blasia sp. AEXY                     |                                    |                                     | Scytosiphon dotyo ULXR               |
|                                   |                                  | Blasia sp. AEXY                     |                                    |                                     | Symphyocladia latiuscula UYFR        |
|                                   |                                  | Blasia sp. AEXY                     |                                    |                                     | Synura petersenii DBYD               |
|                                   |                                  | Blasia sp. AEXY                     |                                    |                                     | Synura sp. VKVG                      |
|                                   |                                  | Blasia sp. AEXY                     |                                    |                                     | Undaria pinnatifida FIDQ             |
|                                   |                                  | Blasia sp. AEXY                     |                                    |                                     | <b>Excavata</b>                      |
|                                   |                                  | Blasia sp. AEXY                     |                                    |                                     | Euglena sp. UNBZ                     |

<sup>1</sup>P.G. Wolf 923 (UTC); Norwich, UK.

<sup>2</sup>D.G. Long s.n. (OXF); Edinburgh, UK

**Table S2.** The calibrations used in dating the divergences within the phototropin gene family.

| No. | Clade                | Calibration                        | Date (MYA)  | Prior                                        | Reference | Justification                                                                                                               |
|-----|----------------------|------------------------------------|-------------|----------------------------------------------|-----------|-----------------------------------------------------------------------------------------------------------------------------|
| 1   | Tracheophyta         | <i>Zosterophyllum sp.</i>          | 416         | lognormal (mean: 3.5, STD: 1, offset: 416)   | 70, 74    | Oldest unequivocal record of total group of lycopsid; see Ref. 72 for detailed justifications                               |
| 2   | Euphyllophyta        | <i>Ibyka sp.</i>                   | 388.2       | lognormal (mean: 3.5, STD: 1, offset: 388.2) | 70, 75    | Oldest unequivocal record of monilophyte based on protoxylem morphology; see Ref. 72 for detailed justifications            |
| 3   | Bryophyta PHOTA      | "type III" fragment                | 330.9-346.7 | lognormal (mean: 1.5, STD: 1, offset: 330.9) | 71        | Oldest unequivocal record of crown Bryophyta; the fibrils and pores similar to those of <i>Sphagnum</i> water-storage cells |
| 4   | Bryophyta PHOTB      | "type III" fragment                | 330.9-346.7 | lognormal (mean: 1.5, STD: 1, offset: 330.9) | 71        | Oldest unequivocal record of crown Bryophyta; the fibrils and pores similar to those of <i>Sphagnum</i> water-storage cells |
| 5   | Jungermanniopsida    | <i>Riccardiathallus devonicus</i>  | 407-411     | lognormal (mean: 1.5, STD: 1, offset: 407)   | 72        | Oldest unequivocal record of crown Jungermanniopsida; gross morphology similar to the extant <i>Riccardia</i> species       |
| 6   | Polypodiopsida PHOT1 | <i>Rastropteris pirtgquanensis</i> | 296         | lognormal (mean: 1.5, STD: 1, offset: 296)   | 8, 76     | Oldest unequivocal record of Osmundaceae stem; see Ref. 8 for detailed justifications                                       |
| 7   | Polypodiopsida PHOT2 | <i>Rastropteris pirtgquanensis</i> | 296         | lognormal (mean: 1.5, STD: 1, offset: 296)   | 8, 76     | Oldest unequivocal record of Osmundaceae stem; see Ref. 8 for detailed justifications                                       |
| 8   | Eupolypod PHOT1      | imported secondary date            | 116.7       | Normal (mean: 116.7, STD: 35.01)             | 8         | A well-established time estimate for the divergence of Eupolypods                                                           |
| 9   | Eupolypod PHOT2      | imported secondary date            | 116.7       | Normal (mean: 116.7, STD: 35.01)             | 8         | A well-established time estimate for the divergence of Eupolypods                                                           |
| 10  | Spermatophyta PHOT1  | <i>Cordaixylon iowensis</i>        | 306.2       | lognormal (mean: 2.5, STD: 1, offset: 306.2) | 70, 77    | Oldest unequivocal record of Acrogymnospermae; see Ref. 72 for detailed justifications                                      |
| 11  | Spermatophyta PHOT2  | <i>Cordaixylon iowensis</i>        | 306.2       | lognormal (mean: 2.5, STD: 1, offset: 306.2) | 70, 77    | Oldest unequivocal record of Acrogymnospermae; see Ref. 72 for detailed justifications                                      |
| 12  | Grass PHOT1          | phytoliths in dinosaur coprolites  | 65-67       | lognormal (mean: 1.5, STD: 1, offset: 65)    | 73        | Oldest unequivocal record of PACMAD or BEP of grass; phytoliths morphology similar to subclades in PACMAD or in BEP         |
| 13  | Grass PHOT2          | phytoliths in dinosaur coprolites  | 65-67       | lognormal (mean: 1.5, STD: 1, offset: 65)    | 73        | Oldest unequivocal record of PACMAD or BEP of grass; phytoliths morphology similar to subclades in PACMAD or in BEP         |
| 14  | Coniferae PHOT1      | <i>Araucaria mirabilis</i>         | 147         | lognormal (mean: 1.5, STD: 1, offset: 147)   | 70        | Oldest unequivocal record of Cupressophyta crown; see Ref. 72 for detailed justifications                                   |
| 15  | Coniferae PHOT2      | <i>Araucaria mirabilis</i>         | 147         | lognormal (mean: 1.5, STD: 1, offset: 147)   | 70        | Oldest unequivocal record of Cupressophyta crown; see Ref. 72 for detailed justifications                                   |

**Table S3.** The primers and PCR protocols used in this study. See Table S4 for primer sequences.

| Taxa                        | Gene                     | Primary PCR primers       | Secondary PCR primers <sup>1</sup> | PCR program <sup>2</sup> | Specimen voucher                               |
|-----------------------------|--------------------------|---------------------------|------------------------------------|--------------------------|------------------------------------------------|
| <b>Hornworts:</b>           |                          |                           |                                    |                          |                                                |
| Phymatoceros phymatodes     | neochrome                | neoF65 + neoR2818         | neoF430 + neoR2776                 | a/a                      | J. Pittermann s.n. (DUKE)                      |
| Phymatoceros phymatodes     | neochrome                | neoF65 + neoR4110         | neoF2367 + neoR3456                | a/a                      | J. Pittermann s.n. (DUKE)                      |
| Phymatoceros phymatodes     | neochrome                | neoF65 + neoR4110         | neoF3230 + neoR4110                | a/a                      | J. Pittermann s.n. (DUKE)                      |
| Phymatoceros phymatodes     | phototropin              | neoF65 + neoR4110         | neoF2367 + neoR3456                | a/a                      | J. Pittermann s.n. (DUKE)                      |
| Phymatoceros phymatodes     | phototropin              | photF1856 + photR2508     | photF1970 + photR2245              | a/a                      | J. Pittermann s.n. (DUKE)                      |
| Phymatoceros phymatodes     | phototropin              | photF2774 + photR4339     | -                                  | a                        | J. Pittermann s.n. (DUKE)                      |
| Megaceros flagellaris       | neochrome                | neoF65 + neoR902          | -                                  | b                        | B. Crandall-Stotler s.n. (ABSH)                |
| Megaceros flagellaris       | neochrome                | neoF649 + neoR1950        | -                                  | b                        | B. Crandall-Stotler s.n. (ABSH)                |
| Megaceros flagellaris       | neochrome                | neoF1844 + neoR2361       | -                                  | c                        | B. Crandall-Stotler s.n. (ABSH)                |
| Megaceros flagellaris       | neochrome                | neoF2239 + neoR3300       | -                                  | b                        | B. Crandall-Stotler s.n. (ABSH)                |
| Megaceros flagellaris       | neochrome                | neoF2361 + neoR4110       | -                                  | c                        | B. Crandall-Stotler s.n. (ABSH)                |
| Megaceros flagellaris       | phototropin              | photF1856 + photR4339     | photF1970 + photR4339              | a/a                      | B. Crandall-Stotler s.n. (ABSH)                |
| Nothoceros aenigmaticus     | neochrome                | F5 + R1_T1                | F565 + R1_T1                       | d/d                      | F.W. Li 1291 (DUKE)                            |
| Nothoceros aenigmaticus     | neochrome <sup>3</sup>   | neoF4018 + AP1            | neoF4110 + AP2                     | e/f                      | F.W. Li 1569 (DUKE)                            |
| Nothoceros aenigmaticus     | neochrome <sup>3</sup>   | neoR429 + AP1             | R3re_phyN + AP2                    | e/f                      | F.W. Li 1569 (DUKE)                            |
| Nothoceros aenigmaticus     | neochrome <sup>3</sup>   | NaNEO_3-1_GM1 + AP1       | NaNEO_3-1_GM2 + AP2                | e/f                      | F.W. Li 1569 (DUKE)                            |
| Nothoceros aenigmaticus     | phototropin              | SupF1 + R7                | SupF2 + R7                         | c/g                      | F.W. Li 1291 (DUKE)                            |
| Nothoceros aenigmaticus     | phototropin <sup>4</sup> | F565 + I_R1               | I_F2 + L_R2                        | d/d                      | F.W. Li 1291 (DUKE)                            |
| Nothoceros aenigmaticus     | phytochrome              | F-200_Maphy + R4850_Maphy | F-3_Maphy + R4450_Maphy            | h/h                      | F.W. Li 1291 (DUKE)                            |
| Phaeoceros carolinianus     | neochrome                | neoF65 + neoR877          | -                                  | c                        | B. Crandall-Stotler s.n. (ABSH)                |
| Phaeoceros carolinianus     | neochrome                | neoF649 + neoR1950        | -                                  | b                        | B. Crandall-Stotler s.n. (ABSH)                |
| Phaeoceros carolinianus     | neochrome                | neoF1576 + neoR4104       | -                                  | a                        | B. Crandall-Stotler s.n. (ABSH)                |
| Anthoceros punctatus        | neochrome                | neoF67 + neoR832          | -                                  | c                        | D. Chamberlain s.n. (E)                        |
| Anthoceros punctatus        | neochrome                | neoF428 + neoR3049        | neoF812 + neoR2938                 | a/g                      | D. Chamberlain s.n. (E)                        |
| Anthoceros punctatus        | neochrome                | neoF2938 + neoR4104-2     | neoF3049 + neoR4104-2              | a/a                      | D. Chamberlain s.n. (E)                        |
| <b>Ferns:</b>               |                          |                           |                                    |                          |                                                |
| Adiantum andicola           | neochrome                | neoF20 + neoR4242         | neoF20 + neoR2336                  | i/c                      | C.J. Rothfels 2641, DB5549 <sup>5</sup> (DUKE) |
| Adiantum hispidulum         | neochrome                | neoF58 + neoR4238         | neoF651 + neoR3718                 | c/c                      | L. Huiet s.n., DB9529 (DUKE)                   |
| Adiantum hispidulum         | neochrome                | neoF20 + neoR4242         | neoF651 + neoR3718                 | i/c                      | L. Huiet s.n., DB9529 (DUKE)                   |
| Adiantum pedatum            | neochrome                | neoF20 + neoR4242         | neoF20 + neoR2336                  | i/c                      | C.J. Rothfels 3839, DB7517 (DUKE)              |
| Adiantum pedatum            | neochrome                | neoF20 + neoR4242         | neoF651 + neoR3718                 | i/c                      | C.J. Rothfels 3839, DB7517 (DUKE)              |
| Adiantum tetraphyllum       | neochrome                | neoF20 + neoR4242         | neoF651 + neoR3718                 | i/c                      | L. Huiet 105, DB2505 (UC)                      |
| Adiantum tetraphyllum       | neochrome                | neoF20 + neoR4242         | neoF20 + neoR2236                  | i/c                      | L. Huiet 105, DB2505 (UC)                      |
| Adiantum tetraphyllum       | neochrome                | neoF1108 + neoR3065       | -                                  | k                        | L. Huiet 105, DB2505 (UC)                      |
| Alsophila podophylla        | neochrome                | neoF20 + neoR4242         | neoF20 + neoR2336                  | i/l                      | E. Schuettpelz 1201A, DB4948 (DUKE)            |
| Alsophila podophylla        | neochrome                | neoF20 + neoR4242         | neoF2115 + neoR4242                | i/l                      | E. Schuettpelz 1201A, DB4948 (DUKE)            |
| Alsophila podophylla        | neochrome                | neoF20 + neoR4242         | neoF538 + neoR4000                 | i/l                      | E. Schuettpelz 1201A, DB4948 (DUKE)            |
| Bolbitis auriculata         | neochrome                | neoF20 + neoR4242         | neoF651 + neoR3718                 | i/c                      | F. Rakotondrainibe, DB3504 (P)                 |
| Dennstaedtia punctilobula   | neochrome                | neoF20 + neoR4242         | neoF651 + neoR3718                 | i/c                      | C.J. Rothfels 4167, DB8975 (DUKE)              |
| Dennstaedtia punctilobula   | neochrome                | neoF20 + neoR4242         | neoF20 + neoR2336                  | i/l                      | C.J. Rothfels 4167, DB8975 (DUKE)              |
| Dennstaedtia punctilobula   | neochrome                | neoF20 + neoR4242         | neoF2115 + neoR4242                | i/l                      | C.J. Rothfels 4167, DB8975 (DUKE)              |
| Deparia acrostichoides      | neochrome                | neoF20 + neoR4242         | neoF651 + neoR3718                 | i/c                      | C.J. Rothfels 3894, DB7797 (DUKE)              |
| Deparia acrostichoides      | neochrome                | neoF20 + neoR4242         | neoF20 + neoR2336                  | i/c                      | C.J. Rothfels 3894, DB7797 (DUKE)              |
| Deparia acrostichoides      | neochrome                | neoF20 + neoR4242         | neoF2115 + neoR4242                | i/c                      | C.J. Rothfels 3894, DB7797 (DUKE)              |
| Deparia lancea              | neochrome                | neoF20 + neoR4242         | neoF651 + neoR3718                 | i/c                      | E. Schuettpelz 298, DB2558 (DUKE)              |
| Deparia lancea              | neochrome                | neoF20 + neoR4242         | neoF2115 + neoR4242                | i/c                      | E. Schuettpelz 298, DB2558 (DUKE)              |
| Didymochlaena truncatula    | neochrome                | neoF20 + neoR4242         | neoF651 + neoR3718                 | i/c                      | E. Schuettpelz 267, DB2435 (DUKE)              |
| Diplazium bombonense        | neochrome                | neoF20 + neoR4242         | neoF2115 + neoR4242                | i/c                      | R.C. Moran 7993, DB3764 (DUKE)                 |
| Doodia media                | neochrome                | neoF20 + neoR4242         | neoF651 + neoR3718                 | i/c                      | E. Schuettpelz 295, DB2555 (DUKE)              |
| Dryopteris amurensis        | neochrome                | neoF20 + neoR4242         | neoF20 + neoR2336                  | i/c                      | A. Uchida 1392, DB7982 (TNS)                   |
| Dryopteris amurensis        | neochrome                | neoF20 + neoR4242         | neoF2115 + neoR4242                | i/c                      | A. Uchida 1392, DB7982 (TNS)                   |
| Dryopteris expansa          | neochrome                | neoF20 + neoR4242         | neoF20 + neoR2336                  | i/c                      | A. Ebihara TH2007-507, DB7977 (TNS)            |
| Dryopteris expansa          | neochrome                | neoF20 + neoR4242         | neoF2115 + neoR4242                | i/c                      | A. Ebihara TH2007-507, DB7977 (TNS)            |
| Hemidictyum marginatum      | neochrome                | neoF20 + neoR4242         | neoF20 + neoR2336                  | i/j                      | M. Christenhusz 2476, DB3054 (CAY)             |
| Hemidictyum marginatum      | neochrome                | neoF20 + neoR4242         | neoF2115 + neoR4242                | i/j                      | M. Christenhusz 2476, DB3054 (CAY)             |
| Hemidictyum marginatum      | neochrome                | neoF20 + neoR4242         | neoF651 + neoR3718                 | i/j                      | M. Christenhusz 2476, DB3054 (CAY)             |
| Hemidictyum marginatum      | neochrome                | neoF1108 + neoR3065       | -                                  | k                        | M. Christenhusz 2476, DB3054 (CAY)             |
| Hypolepis tenuifolia        | neochrome                | neoF20 + neoR4242         | neoF2115 + neoR4242                | i/c                      | E. Schuettpelz 286, DB2574 (DUKE)              |
| Macrothelypteris torresiana | neochrome                | neoF20 + neoR4242         | neoF651 + neoR3718                 | i/c                      | Schuettpelz 335, DB2980 (DUKE)                 |
| Macrothelypteris torresiana | neochrome                | neoF20 + neoR4242         | neoF20 + neoR2336                  | i/c                      | Schuettpelz 335, DB2980 (DUKE)                 |
| Macrothelypteris torresiana | neochrome                | neoF20 + neoR4242         | neoF2115 + neoR4242                | i/c                      | Schuettpelz 335, DB2980 (DUKE)                 |
| Matteuccia struthiopteris   | neochrome                | neoF20 + neoR786          | -                                  | b                        | A. Larsson 258, DB7946 (DUKE)                  |
| Matteuccia struthiopteris   | neochrome                | neoF649 + neoR1950        | -                                  | b                        | A. Larsson 258, DB7946 (DUKE)                  |
| Matteuccia struthiopteris   | neochrome                | neoF1530 + neoR2300       | -                                  | m                        | A. Larsson 258, DB7946 (DUKE)                  |
| Matteuccia struthiopteris   | neochrome                | neoF2239 + neoR3300       | -                                  | m                        | A. Larsson 258, DB7946 (DUKE)                  |
| Matteuccia struthiopteris   | neochrome                | neoF2935 + neoR3720       | -                                  | m                        | A. Larsson 258, DB7946 (DUKE)                  |
| Matteuccia struthiopteris   | neochrome                | neoF58 + neoR4238         | neoF651 + neoR3718                 | c/c                      | A. Larsson 258, DB7946 (DUKE)                  |
| Onoclea sensibilis          | neochrome                | neoF20 + neoR4242         | neoF651 + neoR3718                 | i/c                      | E. Schuettpelz 353, DB2998 (DUKE)              |
| Onoclea sensibilis          | neochrome                | neoF20 + neoR4242         | neoF2115 + neoR4242                | i/c                      | E. Schuettpelz 353, DB2998 (DUKE)              |
| Phegopteris hexagonoptera   | neochrome                | neoF20 + neoR4242         | neoF651 + neoR3718                 | i/c                      | M. Christenhusz 3844, DB2731 (TUR)             |
| Phegopteris hexagonoptera   | neochrome                | neoF20 + neoR4242         | neoF2115 + neoR4242                | i/c                      | M. Christenhusz 3844, DB2731 (TUR)             |
| Plagiogyria formosana       | neochrome                | neoF20 + neoR786          | -                                  | b                        | E. Schuettpelz 1083A, DB4826 (DUKE)            |
| Plagiogyria formosana       | neochrome                | neoF649 + neoR1950        | -                                  | b                        | E. Schuettpelz 1083A, DB4826 (DUKE)            |
| Plagiogyria formosana       | neochrome                | neoF1530 + neoR2300       | -                                  | m                        | E. Schuettpelz 1083A, DB4826 (DUKE)            |
| Plagiogyria formosana       | neochrome                | neoF2935 + neoR3720       | -                                  | m                        | E. Schuettpelz 1083A, DB4826 (DUKE)            |
| Tectaria zeylanica          | neochrome                | neoF20 + neoR4242         | -                                  | i                        | E. Schuettpelz 514, DB3569 (GOET)              |
| Thelypteris noveboracensis  | neochrome                | neoF20 + neoR4242         | neoF2115 + neoR4242                | i/l                      | C.J. Rothfels 4164, DB8972 (DUKE)              |

<sup>1</sup>The primer pair for secondary PCR in nested PCR reaction. "-" indicates no nested PCR was conducted.

<sup>2</sup>The PCR program used (primary PCR/secondary PCR, if nested PCR was used).

<sup>3</sup>Genome walking using Clontech Genome Walker kit.

<sup>4</sup>Genome walking using Inverse PCR.

<sup>5</sup>Fern DNA Database number (<http://fernlab.biology.duke.edu>).

a 98:30s, (98:10s, 70:30s, 72:90s)x35, 72:600s  
b 98:30s, (98:10s, 60:30s, 72:90s)x35, 72:600s  
c 98:30s, (98:10s, 72:120s)x35, 72:600s  
d 98:30s, (98:10s, 72:180s)x35, 72:600s  
e (94:25s, 72:180s)x7, (94:25s, 67:180s)x32, 67:420s  
f (94:25s, 72:180s)x5, (94:25s, 67:180s)x20, 67:420s  
g 98:30s, (98:10s, 67:30s, 72:90s)x35, 72:600s  
h 98:30s, (98:10s, 67:30s, 72:150s)x35, 72:600s  
i 98:30s, (98:10s, 68:30s, 72:120s)x35, 72:600s  
j 94:300s, (94:60s, 60:60, 72:120s)x35, 72:600s  
k 94:300s, (94:60s, 56:60, 72:240s)x35, 72:600s  
l 98:30s, (98:10s, 70:30s, 72:120s)x35, 72:600s  
m 98:30s, (98:10s, 55:30s, 72:90s)x35, 72:600s

**Table S4.** The primer sequences.

| Primer        | Sequence (5'-3')              |
|---------------|-------------------------------|
| SupF1         | ATTCACAAATGTTGCCCGATGTGC      |
| SupF2         | CTGCACTCTACTCGTTACCG          |
| AP1           | GTAATACGACTCACTATAGGGC        |
| AP2           | ACTATAGGGCACGCGTGGT           |
| F-200_Maphy   | AGCGTGTAGCCTTGTCTGTAC         |
| F-3_Maphy     | GCGACAGCGCAAAGTTGAAG          |
| F5            | GCGGCAGGCTGCTCAACTACAG        |
| F565          | TACACCGAAGGCTACAAGGCTAATG     |
| I_F2          | CAAGTGCAATCCAATGATGCCGC       |
| I_R1          | TTCTGTAGTTGAGCAGCCTGCC        |
| I_R2          | GAGGAGTAGCCGTCATGGTGAAG       |
| NaNEO_3-1_GM1 | TGTGGAACAAAGGCAACTTGGGACGAA   |
| NaNEO_3-1_GM2 | ATGTGAAGCCTCAAGCAAATGTTACAAGT |
| neoF1108      | GTGCAGCTCAACATKGAGCTGGA       |
| neoF1530      | TCBTRTTTTGGTTYAGGTCRCAYACTGC  |
| neoF1576      | CTGGACAGGGACGACTCTCG          |
| neoF1844      | CATTGAGGACAAGGAGGATTACCAGG    |
| neoF20        | CCAAGACGAAGCACAGCGTG          |
| neoF2115      | GGAGGTGATTGGAGSCAACTGC        |
| neoF2239      | AGGAAAGATGGYAGCWRYTTYTGAA     |
| neoF2300      | GCTRGAGGTDASCAAGTACADGAGGG    |
| neoF2361      | CGGCACCAGGACAAGTTTCTG         |
| neoF2367      | CAGTCSCTCATCAAGTACGAYGT       |
| neoF2935      | GTKCAGCTYATCCGAGATGCAGT       |
| neoF2938      | CTGTCCTGGAGATCGTGAACACACC     |
| neoF3049      | CAACAGAAGGTGGCGGATTATGTTCC    |
| neoF3230      | CAGACCATCTATGGGTGCGGCATT      |
| neoF4018      | ATCTTGCTTACGAGATGCTCTATGGC    |
| neoF4110      | TACATCCCAACCAGCATCCAGTGAG     |
| neoF428       | GYACGATSTGCGGATGCTTTCAC       |
| neoF430       | ACGGATSTGCGGATGCTTTCAC        |
| neoF58        | AGBGCNGATGCMAGRCTYCATGC       |
| neoF649       | GATCGDGTGATGGCBTACAARTTYCA    |
| neoF649       | GATCGDGTGATGGCBTACAARTTYCA    |
| neoF65        | ATGCGAGGCTKAATGCGGCGTTTGAG    |
| neoF651       | TCGGGTGATGGCCTACAAGTTCCA      |
| neoF67        | GCGAGGCTGMATCGGYGTTYGAG       |
| neoF812       | ACAAGTTYCAYGAGGACGAGCACG      |
| neoR1950      | CCYCGAAYNGCYTCCATCCAYTCTG     |
| neoR2236      | AGAAGYTGCTGCCRTCTTCTGTA       |
| neoR2361      | CRGAAACCTTGCTCGGTGCGG         |
| neoR2776      | GCGAAGATGATGGGGTTGTCCG        |
| neoR2818      | GCACCTCTCCCTGCTACTCTGTACG     |
| neoR2938      | GGTGTAGTTCACGATCTCCAGGGACAG   |
| neoR3049      | GGAACATAATCCGCCACTTCTGTTG     |
| neoR3065      | CTGHACTCCGATGAAGTACTGGA       |
| neoR3300      | GYARCTSGGATCTGWGATCAC         |
| neoR3456      | AGCATCATSGCCTTGCCATG          |
| neoR3718      | TGACVCCATGCAGTGGAGGTAATC      |
| neoR3720      | GTTCTCBGGCTTSAGRTBCGGTAGATG   |
| neoR4104      | ATGCTGGTKGGGAATGTRAGCTCCTTG   |
| neoR4104-2    | AYGCTGSTSGGAAKGTGAGCTCCTTG    |
| neoR4110      | AGGCTCACTGGGATGCTGGTTGGG      |
| neoR4238      | CGGATRAGAGGCCAGTYGATKYCTYGA   |
| neoR4242      | CGGATGAGAGGCCAGTCGATKYCT      |
| neoR429       | GAGTGAACAGCATCCGCACATCCGTG    |
| neoR786       | GGTARTGCARGCCVAGRTAHGGCTCC    |
| neoR832       | GAGGCTGATCGGCTGGTGGAGC        |
| neoR877       | ATGTAAGTGCCTGGCAACCGTGC       |
| neoR902       | GACGAGACGGAGCCATGTTGC         |
| photF1856     | CTGGTGSTCAAGGAGGAGCTGG        |
| photF1970     | GCTCTCCWCCTTCCAGCAGACG        |
| photF2645     | CTTCGCCTCYGACCAYTTCCTGG       |
| photF2774     | GGAGAGACGGGACATCACTGTGC       |
| photR2508     | AGCAGCGACAGAAATCCCGAGGAC      |
| photR2901     | GCTCGTACTCGTSCCRCTCCAG        |
| photR4102     | ATGCTGSTSGGRAATGTGAGCTCCTGTT  |
| photR4339     | TCYKCTCGTCCCACTCCAGRTC        |
| R1_T1         | ACCCAGGATCAAAACACATCGCTG      |
| R3re          | GACGCATTCTCGCTCATTGCCAGGAT    |
| R4450_Maphy   | CCATCCACCACAGTTCTGAACAC       |
| R4850_Maphy   | AAAATGTCCAGGACCGTCAGGTTCC     |
| R7            | AGAGTGGTGCCCAAGTCAATTCC       |
